# Supplementary material for: Duplication in ECR near HMX1 and a SNP in GATA6 Genes Regulate Microtia in Awassi Sheep
Source: MDPI journal article supplement (doi:10.3390/genes11060597), 2020-05-28
Supplement: s1 [file s1]

**Table S1.** GATA6-Exon 6, detected mutation (rs405842265), genotype frequency, allele frequency and Chi-square value for CC, AC and AA genotypes detected in each ear phenotype in Awassi sheep.

| Phenotype  | Allele Frequency |       | Genotype Frequency |     |     | Chi Square <i>p</i> -value |
|------------|------------------|-------|--------------------|-----|-----|----------------------------|
|            | C                | A     | CC                 | AC  | AA  |                            |
| Earless    | 87.5%            | 12.5% | 75%                | 25% | 0%  | 0.3074 <sup>n.s</sup>      |
| Short Ear  | 80%              | 20%   | 70%                | 20% | 10% |                            |
| Normal Ear | 90%              | 10%   | 80%                | 20% | 0%  |                            |

n.s: non-significant.

**Table 2.** Gene and genotype frequencies and the relationship between ear phenotypes and deletion nucleotides detected in the inter genic region between GATA6 and MIB1 genes in Awassi sheep.

| Phenotype  | SS  | RR     | SR     | Chi Square <i>p</i> -value |
|------------|-----|--------|--------|----------------------------|
| Earless    | 25% | 56.25% | 18.75% | 0.0880 <sup>n.s</sup>      |
| Short ear  | 5%  | 70%    | 25%    |                            |
| Normal ear | 0%  | 80%    | 20%    |                            |

n.s: non-significant.
